# Supplementary material for: Effectiveness of the implementation project ‘Don’t forget the mouth!’ of community dwelling older people with dementia: a prospective longitudinal single-blind multicentre study protocol (DFTM!)
Source: PubMed Central journal article supplement (PMC6537198; doi:10.1186/s12903-019-0786-5), 2019-05-28
Supplement: 12903_2019_786_MOESM1_ESM.pdf [file 12903_2019_786_MOESM1_ESM.pdf]

## Appendix I

### Oral Health Assessment Tool (OHAT) voor screening van de mond

gemodificeerd van Kayser-Jones et al (1995) door Chalmers (2005)

| Bewoner: _____                                                                                                                                                                                                                                                                                                                                                                                         |                                                                                                                                                                                                            |                                                                                                                                        |                                                                                                                                                                                       | Datum: ___/___/___          |
|--------------------------------------------------------------------------------------------------------------------------------------------------------------------------------------------------------------------------------------------------------------------------------------------------------------------------------------------------------------------------------------------------------|------------------------------------------------------------------------------------------------------------------------------------------------------------------------------------------------------------|----------------------------------------------------------------------------------------------------------------------------------------|---------------------------------------------------------------------------------------------------------------------------------------------------------------------------------------|-----------------------------|
| Ingevuld door: _____ Functie/rol: _____                                                                                                                                                                                                                                                                                                                                                                |                                                                                                                                                                                                            |                                                                                                                                        |                                                                                                                                                                                       |                             |
| Categorie                                                                                                                                                                                                                                                                                                                                                                                              | Scores – U kunt zowel individuele woorden omcirkelen als ook een score geven aan elke categorie<br>(* als 1 of 2 wordt gescoord voor enige categorie: regel a.u.b. een tandarts die de bewoner onderzoekt) |                                                                                                                                        |                                                                                                                                                                                       | Hoogste score per categorie |
|                                                                                                                                                                                                                                                                                                                                                                                                        | 0 = gezond                                                                                                                                                                                                 | 1 = veranderingen*                                                                                                                     | 2 = ongezond*                                                                                                                                                                         |                             |
| Lippen                                                                                                                                                                                                                                                                                                                                                                                                 | glad, roze, vochtig                                                                                                                                                                                        | droog, schraal of rode mondhoeken                                                                                                      | zwellings of knobbel, witte/rode/zwerende plek; bloedende/zwerende mondhoeken                                                                                                         |                             |
| Tong                                                                                                                                                                                                                                                                                                                                                                                                   | normaal, vochtig, ruw, roze                                                                                                                                                                                | gevekt, gegroefd, rood, beslagen                                                                                                       | rode en/of witte, zwerende of gezwollen plek                                                                                                                                          |                             |
| Tandvlees en slijmvliezen                                                                                                                                                                                                                                                                                                                                                                              | roze, vochtig, glad, geen bloeding                                                                                                                                                                         | droog, glimmend, ruw, rood, gezwollen, één zweer/ pijnlijke plek onder kunstgebit                                                      | gezwollen, bloedend, zweren, witte/rode plekken, algemene roodheid onder kunstgebit                                                                                                   |                             |
| Speeksel                                                                                                                                                                                                                                                                                                                                                                                               | vochtige weefsels, waterig en vrij-vloeiend speeksel                                                                                                                                                       | droog, plakkerige weefsels, weinig speeksel aanwezig, bewoner meent een droge mond te hebben                                           | weefsels uitgedroogd en rood, zeer weinig/geen speeksel aanwezig, speeksel is dik, bewoner meent een droge mond te hebben                                                             |                             |
| Eigen tanden Ja/Nee                                                                                                                                                                                                                                                                                                                                                                                    | geen rotte of afgebroken tanden/wortels                                                                                                                                                                    | 1-3 rotte of afgebroken tanden/wortels of zeer afgesleten tanden                                                                       | 4+ rotte of afgebroken tanden/wortels, of zeer afgesleten tanden, of minder dan 4 tanden                                                                                              |                             |
| Kunstgebit Ja/Nee                                                                                                                                                                                                                                                                                                                                                                                      | geen kapotte gebieden of tanden, kunstgebit wordt regelmatig gedragen en is voorzien van naam                                                                                                              | 1 kapot gebied/tand, of kunstgebit wordt alleen gedragen gedurende 1-2 uur per dag, kunstgebit is niet voorzien van naam of zit los    | meer dan 1 kapot gebied/tand, kunstgebit ontbreekt of wordt niet gedragen, zit los en heeft kleefpasta nodig of is niet voorzien van naam                                             |                             |
| Mondhygiëne                                                                                                                                                                                                                                                                                                                                                                                            | schoon en geen voedseldeeltjes of tandsteen in de mond of op kunstgebit                                                                                                                                    | voedseldeeltjes/tandsteen/ plaque in 1-2 gebieden van de mond of op klein gedeelte van kunstgebit aanwezig of halitosis (slechte adem) | voedseldeeltjes/tandsteen/ plaque in de meeste gebieden van de mond of kunstgebit of ernstige halitosis (slechte adem)                                                                |                             |
| Mondpijn                                                                                                                                                                                                                                                                                                                                                                                               | geen gedragsmatige, verbale of fysieke tekenen van mondpijn                                                                                                                                                | er zijn verbale en/of gedragsmatige signalen van pijn zoals trekken aan het gezicht, kauwen op de lip, niet eten, agressie             | er zijn zowel fysieke tekenen van pijn (zwellings van wang of tandvlees, gebroken tanden, zweren) als verbale en/of gedragsmatige signalen (trekken aan gezicht, niet eten, agressie) |                             |
| <input type="checkbox"/> Regel voor de bewoner een mondonderzoek door een tandarts<br><input type="checkbox"/> Bewoner en/of familie/ wettelijk vertegenwoordiger weigert tandheelkundige behandeling<br><input type="checkbox"/> Voltooi mondzorgplan en start mondzorginterventie voor bewoner<br><input type="checkbox"/> Evalueer de mondgezondheid van deze bewoner opnieuw op Datum: ___/___/___ |                                                                                                                                                                                                            |                                                                                                                                        |                                                                                                                                                                                       | TOTALE SCORE:               |
